# Supplementary material for: Binding Mechanism of CD47 with SIRPα Variants and Its Antibody: Elucidated by Molecular Dynamics Simulations
Source: MDPI journal article supplement (doi:10.3390/molecules28124610), 2023-06-07
Supplement: s1 [file s1]

## Supporting Information

### Binding Mechanism of CD47 with SIRP $\alpha$ Variants and Its Antibody: Elucidated by Molecular Dynamics Simulations

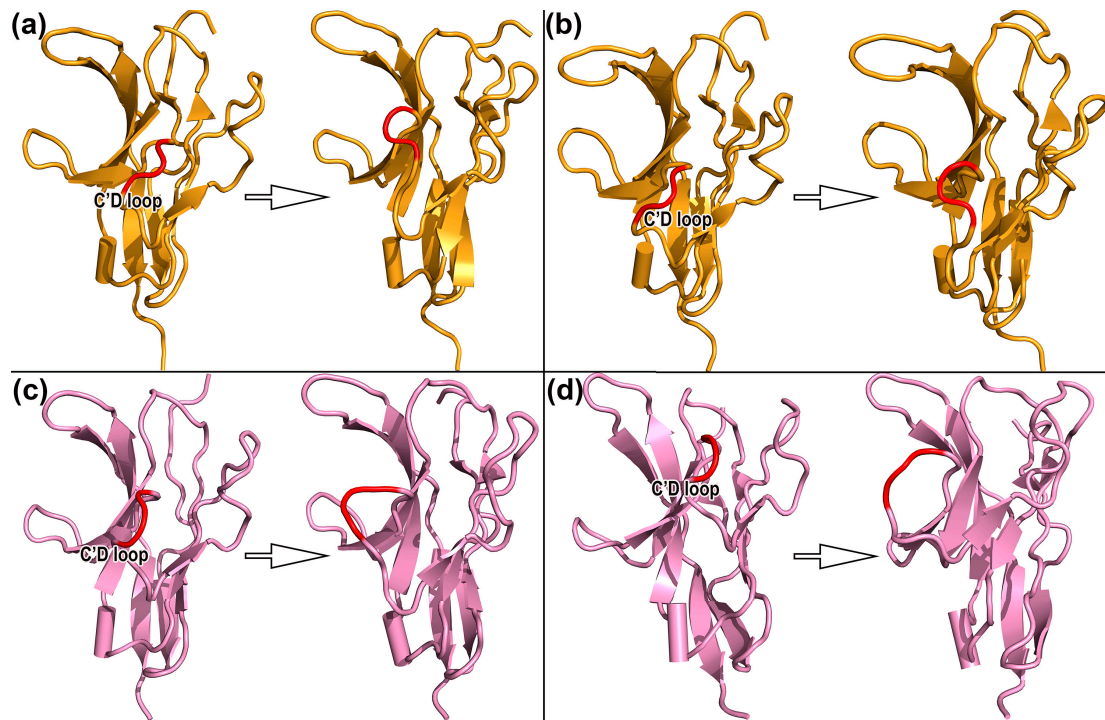

**Figure S1.** Dynamical changes of the C'D loops throughout the simulations. (a) SIRP $\alpha$ 1 in simulation2, (b) SIRP $\alpha$ 1 in simulation3, (c) SIRP $\alpha$ 2 in simulation2, (d) SIRP $\alpha$ 2 in simulation3. The left half of each figure shows the structural state at the beginning of the simulation, and the right half shows the equilibrium structural state at the end. The C'D loops are important components of the critical groove regions on the binding interfaces of SIRP $\alpha$ 1 and SIRP $\alpha$ 2.

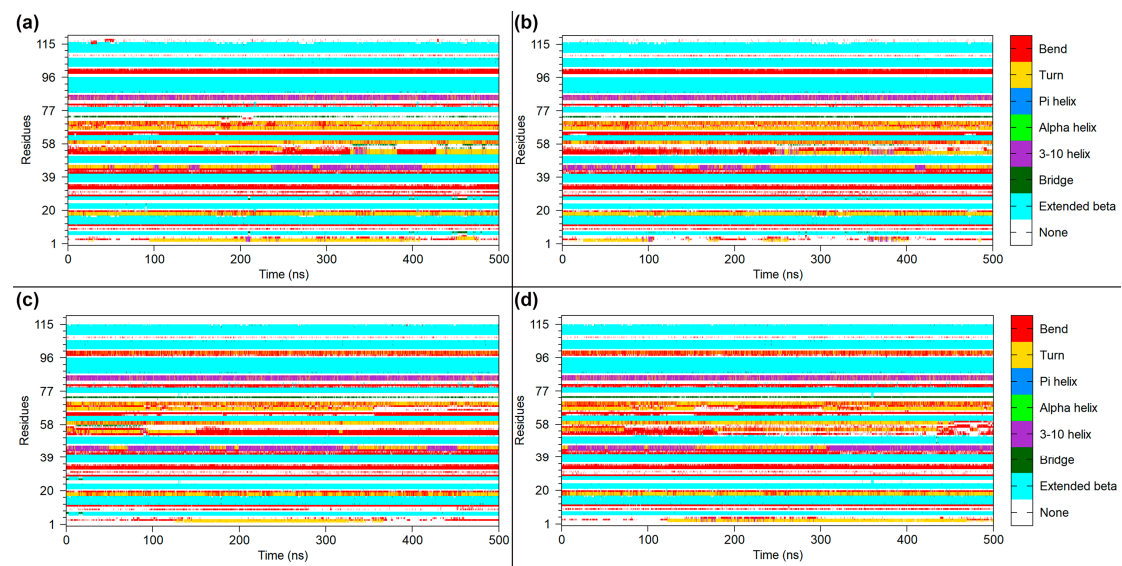

**Figure S2.** The DSSP analysis of SIRP $\alpha$  variants. (a) SIRP $\alpha$ v1 in simulation2, (b) SIRP $\alpha$ v1 in simulation3, (c) SIRP $\alpha$ v2 in simulation2, (d) SIRP $\alpha$ v2 in simulation3. The DSSP maps exhibit the secondary structure changes of SIRP $\alpha$ v1 and SIRP $\alpha$ v2 during simulations.

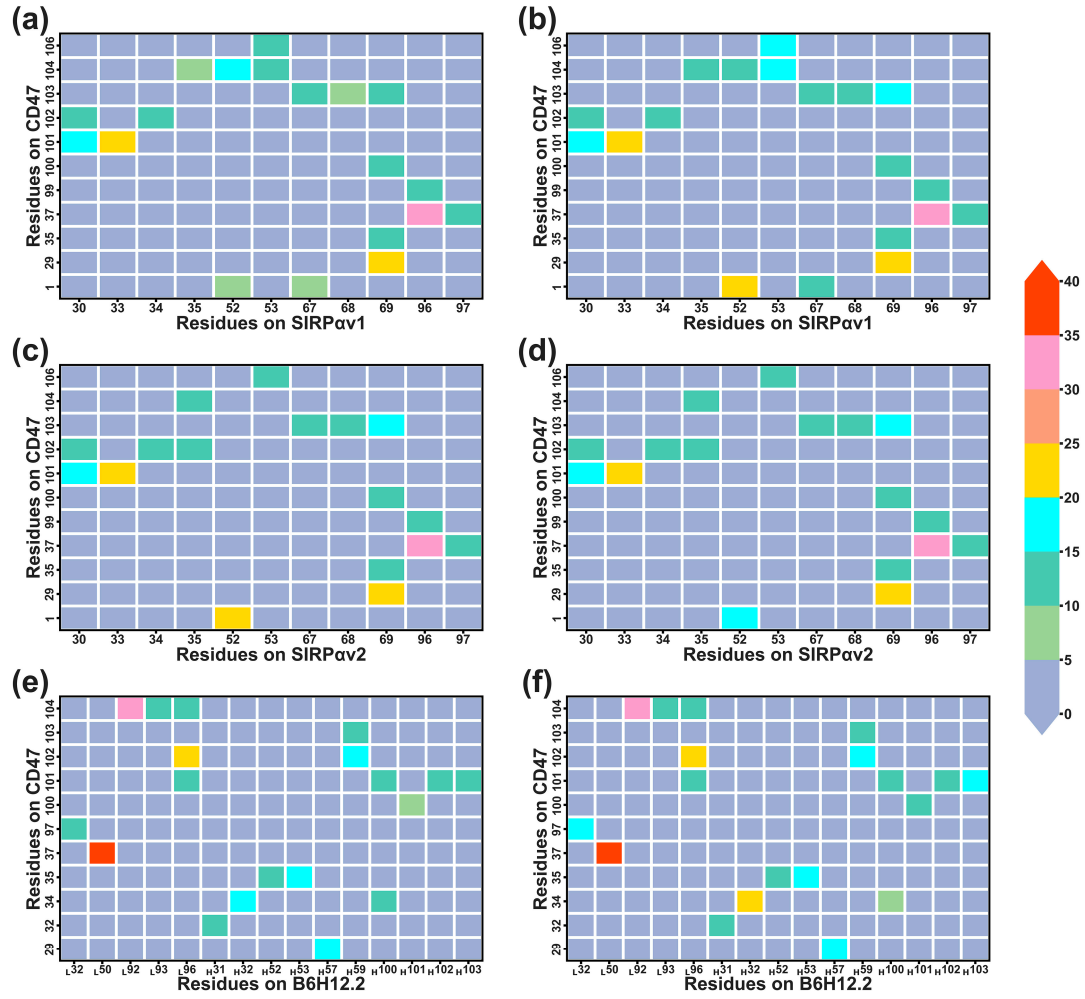

**Figure S3.** The residue-residue contact maps of three complexes. (a) CD47/SIRP $\alpha$ v1 in the second simulation, (b) CD47/SIRP $\alpha$ v1 in the third simulation, (c) CD47/SIRP $\alpha$ v2 in the second simulation, (d) CD47/SIRP $\alpha$ v2 in the third simulation, (e) CD47/B6H12.2 in the second simulation, and (f) CD47/B6H12.2 in the third simulation. The numerical values on the color bar represent fractions obtained by the native contact calculations. The fractions indicate the tightness of contacts between residues and the higher fractions represent the tighter contacts. The subscript “L” and “H” represent the light and the heavy chain, respectively.

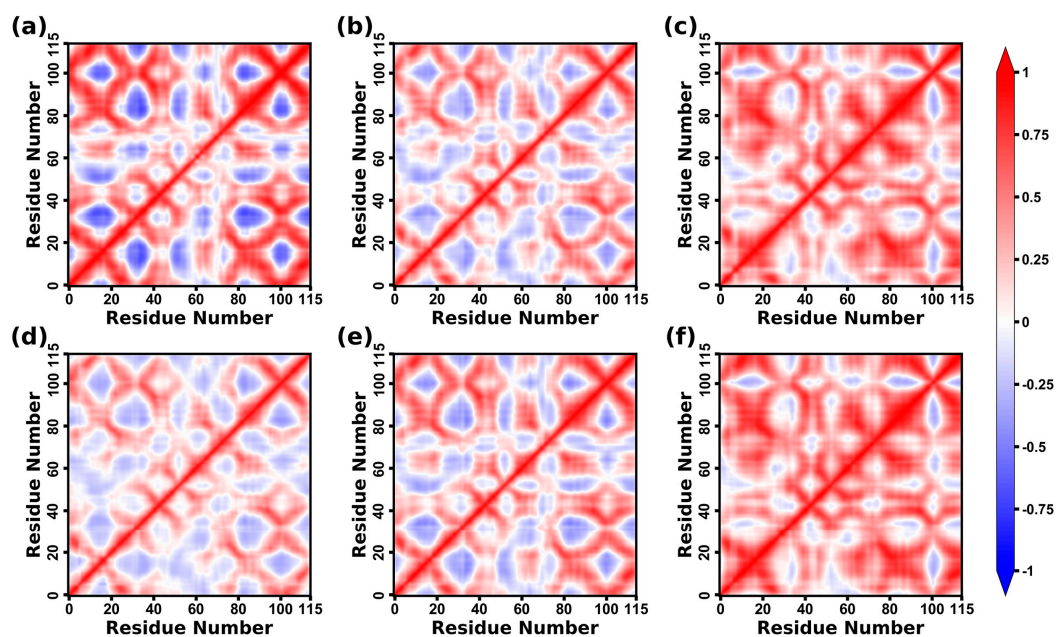

**Figure S4.** The Dynamical Cross Correlation Matrix (DCCM) maps for the CD47 proteins. (a) CD47/SIRP $\alpha$ v1 in the second simulation, (b) CD47/SIRP $\alpha$ v2 in the second simulation, (c) CD47/B6H12.2 in the second simulation, (d) CD47/SIRP $\alpha$ v1 in the third simulation, (e) CD47/SIRP $\alpha$ v2 in the third simulation, and (f) CD47/B6H12.2 in the third simulation. The motion correlations between C $\alpha$  atoms were calculated by DCCM and different C $\alpha$  atoms are used to represent the corresponding residues. The motion correlations are represented by values between -1 and +1, and the higher values indicate the stronger correlations. The maps on both sides of the DCCM diagonals are completely symmetrical.

**Table S1.** The Binding Free Energies for CD47 to the Binding Partners Calculated by MM-GBSA <sup>a</sup>.

| Contribution                   | CD47-SIRP $\alpha$ v1 | CD47-SIRP $\alpha$ v2 | CD47-B6H12.2        |
|--------------------------------|-----------------------|-----------------------|---------------------|
| <b>Simulation2</b>             |                       |                       |                     |
| $\Delta E_{ele}$               | $-531.32 \pm 107.31$  | $-525.10 \pm 53.86$   | $-541.19 \pm 29.78$ |
| $\Delta E_{vdw}$               | $-84.12 \pm 10.08$    | $-84.39 \pm 7.75$     | $-98.18 \pm 5.98$   |
| $\Delta E_{gas}$ <sup>b</sup>  | $-615.44 \pm 114.34$  | $-609.49 \pm 55.75$   | $-639.37 \pm 29.64$ |
| $\Delta G_{sol-polar}$         | $551.85 \pm 99.84$    | $539.13 \pm 50.65$    | $557.91 \pm 25.35$  |
| $\Delta G_{sol-np}$            | $-13.45 \pm 1.89$     | $-14.29 \pm 0.92$     | $-14.04 \pm 0.61$   |
| $\Delta G_{sol}$ <sup>c</sup>  | $538.40 \pm 98.14$    | $524.84 \pm 50.09$    | $543.87 \pm 25.14$  |
| $\Delta H_{tot}$ <sup>d</sup>  | $-77.05 \pm 18.11$    | $-84.65 \pm 9.27$     | $-95.50 \pm 9.20$   |
| $T\Delta S$ <sup>e</sup>       | $-52.84 \pm 9.54$     | $-52.91 \pm 6.57$     | $-55.29 \pm 7.32$   |
| $\Delta G_{bind}$ <sup>f</sup> | $-24.21$              | $-31.74$              | $-40.21$            |
| <b>Simulation3</b>             |                       |                       |                     |
| $\Delta E_{ele}$               | $-614.16 \pm 55.04$   | $-498.05 \pm 90.03$   | $-542.20 \pm 28.51$ |
| $\Delta E_{vdw}$               | $-88.13 \pm 6.93$     | $-82.05 \pm 8.83$     | $-98.05 \pm 6.05$   |
| $\Delta E_{gas}$               | $-702.29 \pm 55.88$   | $-580.10 \pm 93.72$   | $-640.25 \pm 28.68$ |
| $\Delta G_{sol-polar}$         | $626.16 \pm 49.93$    | $517.68 \pm 83.19$    | $559.28 \pm 25.01$  |
| $\Delta G_{sol-np}$            | $-14.99 \pm 0.74$     | $-13.24 \pm 1.42$     | $-14.07 \pm 0.56$   |
| $\Delta G_{sol}$               | $611.17 \pm 49.50$    | $504.44 \pm 82.08$    | $545.21 \pm 24.81$  |
| $\Delta H_{tot}$               | $-91.13 \pm 9.56$     | $-75.66 \pm 13.93$    | $-95.04 \pm 7.90$   |
| $T\Delta S$                    | $-53.93 \pm 5.77$     | $-53.80 \pm 6.49$     | $-54.76 \pm 6.34$   |
| $\Delta G_{bind}$              | $-37.20$              | $-21.86$              | $-40.28$            |

<sup>a</sup> The values after the “ $\pm$ ” signs indicate the standard deviations. This table show the results of the second and the third simulations. The unit of Binding Free Energies is “kcal/mol”.

<sup>b</sup>  $\Delta E_{gas} = E_{internal} + E_{ele} + E_{vdw}$ .

<sup>c</sup>  $\Delta G_{sol} = E_{sol-np} + E_{sol-polar}$ .

<sup>d</sup>  $\Delta H_{tot} = \Delta E_{gas} + \Delta G_{sol}$ , the enthalpy change.

<sup>e</sup>  $T\Delta S$ , entropy change.

<sup>f</sup>  $\Delta G_{bind} = \Delta H_{tot} - T\Delta S$ , the Gibbs free energy.

**Table S2.** The hydrogen bonds at the protein binding interfaces of CD47/SIRP $\alpha$ v1, CD47/SIRP $\alpha$ v2, and CD47/B6H12.2 <sup>a</sup>.

| Acceptor residues                      | Acceptor atoms | Donor residues       | Donor atoms | Fraction1 <sup>b</sup> | Fraction2 | Fraction3 |
|----------------------------------------|----------------|----------------------|-------------|------------------------|-----------|-----------|
| <b>CD47-SIRP<math>\alpha</math>v1:</b> |                |                      |             |                        |           |           |
| SIRP $\alpha$ _Thr67                   | O              | CD47_Arg103          | NH1         | 88.39%                 | 84.93%    | 91.16%    |
| CD47_Leu101                            | O              | SIRP $\alpha$ _Gly34 | N           | 79.75%                 | 73.11%    | 80.38%    |
| CD47_Glu35                             | OE2            | SIRP $\alpha$ _Arg69 | NH2         | 49.75%                 | 49.16%    | 52.81%    |
| CD47_Glu35                             | OE1            | SIRP $\alpha$ _Arg69 | NH2         | 49.22%                 | 50.90%    | 48.36%    |
| CD47_Glu35                             | OE1            | SIRP $\alpha$ _Arg69 | NH1         | 34.85%                 | 45.86%    | 43.36%    |
| CD47_Glu35                             | OE2            | SIRP $\alpha$ _Arg69 | NH1         | 27.67%                 | 41.40%    | 47.19%    |
| CD47_Glu100                            | OE1            | SIRP $\alpha$ _Arg69 | NH1         | 31.02%                 | 44.86%    | 37.69%    |
| SIRP $\alpha$ _Gln52                   | O              | CD47_Gln1            | NE2         | 36.95%                 | 7.24%     | 43.49%    |
| CD47_Asp51                             | OD2            | SIRP $\alpha$ _Arg95 | NH1         | 27.76%                 | 34.26%    | 32.49%    |
| CD47_Glu100                            | OE2            | SIRP $\alpha$ _Arg69 | NH1         | 21.77%                 | 24.67%    | 48.63%    |
| CD47_Asp46                             | OD1            | SIRP $\alpha$ _Ser98 | OG          | 27.96%                 | 27.41%    | 32.26%    |
| CD47_Asp51                             | OD1            | SIRP $\alpha$ _Arg95 | NH1         | 28.08%                 | 19.55%    | 31.52%    |
| CD47_Asp46                             | OD2            | SIRP $\alpha$ _Ser98 | OG          | 20.27%                 | 26.92%    | 33.74%    |
| CD47_Asp51                             | OD2            | SIRP $\alpha$ _Arg95 | NH2         | 25.25%                 | 27.88%    | 29.60%    |
| CD47_Asp51                             | OD1            | SIRP $\alpha$ _Arg95 | NH2         | 25.86%                 | 21.06%    | 28.09%    |
| SIRP $\alpha$ _Gln52                   | OE1            | CD47_Glu104          | N           | 23.28%                 | 21.12%    | 3.55%     |
| <b>CD47-SIRP<math>\alpha</math>v2:</b> |                |                      |             |                        |           |           |
| SIRP $\alpha$ _Thr67                   | O              | CD47_Arg103          | NH1         | 86.75%                 | 90.19%    | 85.80%    |
| CD47_Leu101                            | O              | SIRP $\alpha$ _Gly34 | N           | 85.18%                 | 83.24%    | 83.27%    |
| CD47_Glu35                             | OE1            | SIRP $\alpha$ _Arg69 | NH2         | 50.61%                 | 48.62%    | 52.99%    |
| CD47_Glu35                             | OE2            | SIRP $\alpha$ _Arg69 | NH2         | 51.46%                 | 52.00%    | 47.72%    |
| CD47_Glu35                             | OE2            | SIRP $\alpha$ _Arg69 | NH1         | 51.63%                 | 46.76%    | 49.83%    |
| CD47_Glu100                            | OE1            | SIRP $\alpha$ _Arg69 | NH1         | 49.31%                 | 45.71%    | 41.79%    |
| CD47_Glu100                            | OE2            | SIRP $\alpha$ _Arg69 | NH1         | 37.97%                 | 41.74%    | 45.84%    |
| CD47_Glu35                             | OE1            | SIRP $\alpha$ _Arg69 | NH1         | 39.36%                 | 44.43%    | 41.80%    |
| CD47_Asp51                             | OD2            | SIRP $\alpha$ _Arg95 | NH1         | 28.26%                 | 36.04%    | 24.54%    |
| CD47_Asp51                             | OD1            | SIRP $\alpha$ _Arg95 | NH1         | 31.35%                 | 30.61%    | 29.60%    |
| CD47_Asp51                             | OD2            | SIRP $\alpha$ _Arg95 | NH2         | 28.00%                 | 28.26%    | 23.61%    |
| CD47_Asp51                             | OD1            | SIRP $\alpha$ _Arg95 | NH2         | 24.99%                 | 29.48%    | 24.56%    |
| <b>CD47-B6H12.2:</b>                   |                |                      |             |                        |           |           |
| CD47_Thr99                             | OG1            | LC_Hie92             | NE2         | 77.36%                 | 71.15%    | 67.44%    |
| CD47_Glu100                            | O              | HC_Gly102            | N           | 76.87%                 | 80.10%    | 80.90%    |
| HC_Gly31                               | O              | CD47_Thr34           | OG1         | 70.27%                 | 63.52%    | 68.58%    |
| CD47_Asp51                             | OD2            | LC_Gln53             | NE2         | 62.09%                 | 53.64%    | 36.49%    |
| CD47_Glu104                            | OE1            | LC_Arg96             | NH1         | 55.32%                 | 53.87%    | 41.68%    |
| CD47_Leu101                            | O              | LC_Arg96             | NE          | 54.75%                 | 55.88%    | 49.23%    |
| CD47_Glu35                             | OE1            | HC_Ser53             | OG          | 52.38%                 | 53.57%    | 34.55%    |
| CD47_Glu35                             | OE2            | HC_Ser53             | OG          | 46.38%                 | 45.29%    | 63.99%    |

|                         |     |            |     |        |        |        |
|-------------------------|-----|------------|-----|--------|--------|--------|
| CD47_Glu97              | OE2 | LC_Tyr32   | OH  | 50.82% | 41.96% | 48.33% |
| CD47_Glu97              | OE1 | LC_Tyr32   | OH  | 42.93% | 50.97% | 46.96% |
| CD47_Glu104             | OE2 | LC_Arg96   | NH1 | 41.36% | 44.13% | 55.27% |
| CD47_Glu35              | OE1 | HC_Ser53   | N   | 32.78% | 35.26% | 39.16% |
| CD47_Glu35              | OE2 | HC_Ser53   | N   | 34.34% | 39.36% | 31.55% |
| CD47_Glu104             | OE1 | LC_Arg96   | NH2 | 33.59% | 33.64% | 34.34% |
| CD47_Glu104             | OE2 | LC_Arg96   | NH2 | 26.33% | 30.08% | 33.04% |
| CD47_Glu104             | OE2 | LC_Gly93   | N   | 34.45% | 28.24% | 28.53% |
| CD47_Asp51 <sup>c</sup> | OD2 | LC_Lys49   | NZ  | 27.08% | 25.98% | 30.97% |
| CD47_Asp51 <sup>d</sup> | OD2 | LC_Lys49   | NZ  | 26.89% | 26.95% | 26.17% |
| CD47_Asp51 <sup>e</sup> | OD2 | LC_Lys49   | NZ  | 27.01% | 22.54% | 23.51% |
| CD47_Glu29              | OE2 | HC_Thr56   | OG1 | 27.35% | 23.70% | 24.02% |
| CD47_Glu104             | OE1 | LC_Gly93   | N   | 22.48% | 28.45% | 26.45% |
| CD47_Glu29              | OE1 | HC_Thr56   | OG1 | 23.19% | 18.54% | 23.42% |
| HC_Ser53                | OG  | CD47_Asn32 | ND2 | 21.81% | 16.71% | 20.89% |

<sup>a</sup> The hydrogen bond interactions in three complexes. The hydrogen bond displayed in each entry appears in all of the triplicate and its fractions are greater than 20% in at least two replicates. LC: light chain, HC: heavy chain.

<sup>b</sup> The “Fraction” means the fraction data in the n-th simulation. The fraction in each entry is a percentage representing the time occupancy of corresponding hydrogen bond over the entire simulation.

<sup>c</sup> The donor hydrogen atom is HZ1 of Lys49 in B6H12.2.

<sup>d</sup> The donor hydrogen atom is HZ2 of Lys49 in B6H12.2.

<sup>e</sup> The donor hydrogen atom is HZ3 of Lys49 in B6H12.2.

**Table S3.** The residue contacts between CD47 and the binding partners of SIRP $\alpha$ v1, SIRP $\alpha$ v2, and B6H12.2 <sup>a</sup>.

| Partner Residues                       | CD47 Residues | Fraction1 (contact number) <sup>b</sup> | Fraction2 (contact number) | Fraction3 (contact number) |
|----------------------------------------|---------------|-----------------------------------------|----------------------------|----------------------------|
| <b>CD47-SIRP<math>\alpha</math>v1:</b> |               |                                         |                            |                            |
| <b>SIRP<math>\alpha</math>v1</b>       | <b>CD47</b>   |                                         |                            |                            |
| Lys96                                  | Tyr37         | 33.0091 (72)                            | 33.4749 (70)               | 34.2263 (68)               |
| Arg69                                  | Glu29         | 22.3867 (75)                            | 21.4958 (74)               | 20.2813 (73)               |
| Val33                                  | Leu101        | 20.8016 (44)                            | 20.3648 (45)               | 20.6121 (45)               |
| Arg69                                  | Arg103        | 19.6945 (49)                            | 13.7356 (53)               | 19.0957 (46)               |
| Lys53                                  | Glu106        | 18.0323 (61)                            | 10.0193 (60)               | 15.3376 (64)               |
| Gln52                                  | Glu104        | 17.9137 (77)                            | 16.0877 (75)               | 14.1651 (76)               |
| Leu30                                  | Leu101        | 16.8555 (51)                            | 16.4331 (52)               | 17.7050 (49)               |
| Gln52                                  | Gln1          | 16.7226 (69)                            | 8.3985 (64)                | 22.9481 (66)               |
| Arg69                                  | Glu100        | 16.2456 (44)                            | 11.4590 (41)               | 13.6959 (40)               |
| Lys53                                  | Glu104        | 15.9955 (53)                            | 14.6090 (72)               | 17.4360 (61)               |
| Pro35                                  | Glu104        | 13.1420 (33)                            | 9.8040 (36)                | 13.6731 (35)               |
| Thr67                                  | Arg103        | 12.7309 (30)                            | 14.9226 (54)               | 12.2632 (24)               |
| Thr67                                  | Gln1          | 12.5711 (56)                            | 8.0386 (59)                | 12.5687 (56)               |
| Leu30                                  | Thr102        | 12.4768 (38)                            | 11.1327 (37)               | 14.3165 (38)               |
| Gly34                                  | Thr102        | 12.4592 (28)                            | 13.3457 (28)               | 13.1057 (26)               |
| Gly97                                  | Tyr37         | 12.3276 (26)                            | 11.2895 (25)               | 12.3270 (26)               |
| Arg69                                  | Glu35         | 12.1039 (22)                            | 12.8249 (19)               | 12.7934 (19)               |
| Lys68                                  | Arg103        | 11.1682 (30)                            | 8.1097 (37)                | 12.6176 (30)               |
| Lys96                                  | Thr99         | 10.8717 (21)                            | 10.3285 (22)               | 10.4585 (22)               |
| <b>CD47-SIRP<math>\alpha</math>v2:</b> |               |                                         |                            |                            |
| <b>SIRP<math>\alpha</math>v2</b>       | <b>CD47</b>   |                                         |                            |                            |
| Lys96                                  | Tyr37         | 32.6041 (70)                            | 33.8034 (70)               | 32.9416 (69)               |
| Val33                                  | Leu101        | 20.5854 (43)                            | 20.6529 (44)               | 20.6855 (43)               |
| Arg69                                  | Glu29         | 20.3434 (75)                            | 21.6205 (75)               | 21.9778 (75)               |
| Leu30                                  | Leu101        | 17.3682 (50)                            | 17.7394 (47)               | 17.4653 (47)               |
| Arg69                                  | Arg103        | 16.7920 (47)                            | 17.4220 (44)               | 16.4169 (46)               |
| Lys53                                  | Glu106        | 15.2269 (69)                            | 14.4445 (66)               | 10.3368 (67)               |
| Gln52                                  | Gln1          | 14.4663 (69)                            | 22.5799 (70)               | 15.5595 (72)               |
| Leu30                                  | Thr102        | 13.8465 (36)                            | 14.5438 (37)               | 13.7198 (36)               |
| Arg69                                  | Glu100        | 13.5221 (42)                            | 13.9531 (40)               | 13.8270 (42)               |
| Arg69                                  | Glu35         | 13.0848 (20)                            | 13.0813 (19)               | 13.2008 (20)               |
| Gly34                                  | Thr102        | 13.0199 (26)                            | 13.3300 (27)               | 13.3222 (28)               |
| Lys68                                  | Arg103        | 12.8664 (32)                            | 13.0592 (29)               | 13.3757 (32)               |
| Pro35                                  | Glu104        | 12.8312 (34)                            | 13.6209 (35)               | 11.7165 (36)               |
| Gly97                                  | Tyr37         | 12.6846 (25)                            | 12.3784 (24)               | 12.4533 (27)               |
| Thr67                                  | Arg103        | 12.1111 (38)                            | 11.9762 (36)               | 11.5455 (34)               |
| Pro35                                  | Thr102        | 10.6633 (35)                            | 10.8817 (36)               | 10.8957 (36)               |



|                      |             |              |              |              |
|----------------------|-------------|--------------|--------------|--------------|
| Lys96                | Thr99       | 10.6250 (22) | 10.4250 (22) | 10.2172 (23) |
| <b>CD47-B6H12.2:</b> |             |              |              |              |
| <b>B6H12.2</b>       | <b>CD47</b> |              |              |              |
| LC_Phe50             | Tyr37       | 36.1970 (60) | 37.3950 (57) | 37.6847 (58) |
| LC_Hie92             | Glu104      | 31.4366 (59) | 31.2090 (59) | 31.3444 (58) |
| LC_Arg96             | Thr102      | 21.2909 (48) | 22.0511 (48) | 21.4896 (48) |
| HC_Tyr32             | Thr34       | 20.2062 (44) | 19.8400 (45) | 20.0178 (47) |
| HC_Tyr59             | Thr102      | 19.0504 (61) | 19.2135 (62) | 18.6948 (63) |
| HC_Ser53             | Glu35       | 16.2749 (27) | 16.1168 (24) | 16.1139 (22) |
| LC_Tyr32             | Glu97       | 14.9205 (30) | 14.9640 (30) | 15.2287 (31) |
| HC_Asn103            | Leu101      | 13.5196 (47) | 13.9190 (47) | 15.5076 (47) |
| HC_Tyr57             | Glu29       | 13.4527 (82) | 16.8604 (83) | 16.1434 (87) |
| HC_Gly31             | Asn32       | 13.3291 (25) | 12.7699 (22) | 12.8637 (23) |
| LC_Arg96             | Glu104      | 11.9179 (22) | 12.1761 (23) | 12.0892 (23) |
| HC_Leu100            | Leu101      | 11.3388 (29) | 10.8494 (26) | 12.0246 (26) |
| HC_Leu100            | Thr34       | 10.9815 (39) | 10.8422 (38) | 9.8038 (36)  |
| HC_Thr52             | Glu35       | 10.7359 (25) | 11.1753 (26) | 11.3602 (25) |
| HC_Gly102            | Leu101      | 10.7352 (22) | 10.9733 (23) | 11.0078 (23) |
| HC_Ala101            | Glu100      | 10.5964 (19) | 9.5177 (18)  | 10.3248 (19) |
| HC_Tyr59             | Arg103      | 10.5198 (47) | 10.8664 (41) | 11.5413 (50) |
| LC_Arg96             | Leu101      | 10.3549 (17) | 10.6934 (17) | 10.3312 (18) |
| LC_Gly93             | Glu104      | 10.0974 (16) | 10.1768 (17) | 10.0075 (18) |

<sup>a</sup> The residue pair displayed in each entry meets the criteria that the same residue pair formed contacts (distance within 5 Å in at least one frame) in all of the triplicate and its final fractions are greater than 10 in at least two replicates. LC: light chain, HC: heavy chain.

<sup>b</sup> The "Fraction" means the fraction data in the n-th simulation. The contact number in each bracket means total number of the atom pairs forming contacts within the corresponding residue pair.

**Table S4.** Comparisons of the Energy Decomposition with the mutation experimental data<sup>a</sup>.

| Residue                    | Mutation effect <sup>b</sup> | Decomposition value of the first simulation | Decomposition value of the second simulation | Decomposition value of the third simulation |
|----------------------------|------------------------------|---------------------------------------------|----------------------------------------------|---------------------------------------------|
| <b>CD47<sup>c</sup></b>    |                              |                                             |                                              |                                             |
| E11K                       | low                          | 0.005 +/- 0.013                             | 0.015 +/- 0.011                              | 0.017 +/- 0.011                             |
| C15G                       | low                          | -0.000 +/- 0.001                            | -0.000 +/- 0.001                             | -0.000 +/- 0.001                            |
| V20D                       | low                          | 0.004 +/- 0.001                             | 0.004 +/- 0.001                              | 0.004 +/- 0.001                             |
| Y37D                       | high                         | -3.607 +/- 0.629                            | -3.646 +/- 0.600                             | -3.535 +/- 0.640                            |
| D46K                       | high                         | 0.092 +/- 0.733                             | 0.068 +/- 0.732                              | 0.091 +/- 0.685                             |
| A53K                       | low                          | -0.281 +/- 0.194                            | -0.292 +/- 0.187                             | -0.302 +/- 0.178                            |
| K67E                       | low                          | 0.071 +/- 0.022                             | 0.063 +/- 0.021                              | 0.061 +/- 0.024                             |
| Q72K                       | low                          | 0.016 +/- 0.008                             | 0.017 +/- 0.008                              | 0.017 +/- 0.008                             |
| E97K                       | high                         | -1.102 +/- 1.576                            | -3.038 +/- 1.729                             | -0.866 +/- 1.768                            |
| E100K                      | high                         | -2.151 +/- 0.917                            | -2.148 +/- 0.893                             | -2.007 +/- 0.894                            |
| E106K                      | middle                       | -0.785 +/- 1.276                            | -0.577 +/- 1.792                             | -0.507 +/- 1.424                            |
| <b>SIRPav1<sup>d</sup></b> |                              |                                             |                                              |                                             |
| E2D                        | low                          | 0.218 +/- 0.044                             | 0.292 +/- 0.119                              | 0.317 +/- 0.121                             |
| D10E                       | low                          | 0.137 +/- 0.011                             | 0.155 +/- 0.011                              | 0.142 +/- 0.010                             |
| T26A                       | low                          | 0.022 +/- 0.012                             | 0.017 +/- 0.012                              | 0.017 +/- 0.012                             |
| A27M                       | high                         | 0.012 +/- 0.023                             | 0.012 +/- 0.016                              | -0.003 +/- 0.021                            |
| Q37M                       | high                         | 0.048 +/- 0.383                             | 0.022 +/- 0.383                              | -0.106 +/- 0.760                            |
| P44A                       | low                          | 0.003 +/- 0.005                             | 0.002 +/- 0.005                              | 0.003 +/- 0.005                             |
| M72L                       | medium                       | -0.054 +/- 0.038                            | -0.041 +/- 0.035                             | -0.061 +/- 0.043                            |
| <b>SIRPav2<sup>e</sup></b> |                              |                                             |                                              |                                             |
| D10K                       | low                          | 0.142 +/- 0.011                             | 0.143 +/- 0.011                              | 0.148 +/- 0.012                             |
| V27M                       | high                         | -0.123 +/- 0.066                            | -0.105 +/- 0.047                             | -0.099 +/- 0.056                            |
| I31K                       | high                         | -0.958 +/- 0.293                            | -1.171 +/- 0.326                             | -1.161 +/- 0.366                            |
| V33E                       | high                         | -6.032 +/- 0.547                            | -5.948 +/- 0.526                             | -5.934 +/- 0.536                            |
| Q37E                       | medium                       | 0.002 +/- 0.658                             | -0.584 +/- 1.514                             | -0.535 +/- 1.515                            |
| P44R                       | low                          | 0.003 +/- 0.003                             | 0.004 +/- 0.004                              | 0.004 +/- 0.004                             |
| E54K                       | low                          | -0.164 +/- 0.711                            | 1.483 +/- 0.741                              | 0.256 +/- 0.975                             |
| H56D                       | medium                       | -0.609 +/- 1.117                            | 0.082 +/- 0.138                              | -0.084 +/- 0.700                            |
| S66D                       | high                         | -0.329 +/- 1.125                            | -0.978 +/- 1.370                             | -0.568 +/- 1.202                            |
| R69E                       | high                         | -13.463 +/- 1.681                           | -13.754 +/- 1.824                            | -13.849 +/- 1.859                           |
| E70K                       | low                          | 0.889 +/- 0.461                             | 0.849 +/- 0.459                              | 0.880 +/- 0.505                             |
| M72R                       | low                          | -0.043 +/- 0.037                            | -0.043 +/- 0.032                             | -0.039 +/- 0.029                            |
| V92E                       | medium                       | 0.027 +/- 0.016                             | 0.031 +/- 0.015                              | 0.029 +/- 0.016                             |
| F94R                       | high                         | -0.029 +/- 0.060                            | -0.006 +/- 0.056                             | -0.016 +/- 0.057                            |
| K96E                       | high                         | -8.090 +/- 2.913                            | -9.454 +/- 3.051                             | -6.700 +/- 3.391                            |
| S98R                       | medium                       | -1.499 +/- 1.213                            | -1.850 +/- 1.277                             | -1.548 +/- 1.252                            |
| D100K                      | high                         | 1.421 +/- 1.274                             | 0.707 +/- 2.332                              | 1.116 +/- 1.765                             |
| T101K                      | low                          | 0.083 +/- 0.051                             | 0.087 +/- 0.052                              | 0.085 +/- 0.051                             |

|       |        |                 |                  |                 |
|-------|--------|-----------------|------------------|-----------------|
| F103D | medium | 0.010 +/- 0.019 | -0.004 +/- 0.022 | 0.002 +/- 0.024 |
| R110K | low    | 0.115 +/- 0.008 | 0.117 +/- 0.008  | 0.119 +/- 0.009 |

<sup>a</sup> The unit of Energy decomposition is "*kcal/mol*"

<sup>b</sup> The mutation experiments [1,2] indicated that affinities of residues changed to less than 35% of natural states after mutation had the high mutation effects, residues changed to 35% and 65% had the middle mutation effects, and residues changed to more than 65% had the low mutation effects.

<sup>c</sup> The mutation experimental data for CD47 in CD47/SIRP $\alpha$ v2 is cited from Hatherley et al. [1].

<sup>d</sup> The mutation experimental data for SIRP $\alpha$ v1 is cited from Liu et al. [2].

<sup>e</sup> The residue mutation experimental data for SIRP $\alpha$ v2 is cited from Hatherley et al. [1] and Liu et al. [2].

## References

1. Hatherley, D.; Harlos, K.; Dunlop, D. C.; Stuart, D. I.; Barclay, A. N., The structure of the macrophage signal regulatory protein alpha (SIRPalpha) inhibitory receptor reveals a binding face reminiscent of that used by T cell receptors. *J Biol Chem* **2007**, 282, (19), 14567-75.
2. Liu, Y.; Tong, Q.; Zhou, Y.; Lee, H.-W.; Yang, J. J.; Bühring, H.-J.; Chen, Y.-T.; Ha, B.; Chen, C. X. J.; Yang, Y.; Zen, K., Functional Elements on SIRP $\alpha$  IgV Domain Mediate Cell Surface Binding to CD47. *Journal of Molecular Biology* **2007**, 365, (3), 680-693.
